# Supplementary material
Source: MDPI journal article supplement (https://www.mdpi.com/2073-4344/13/7/1121)
Supplement: s1 [file s1]

Supplementary materials

# Effect of Ultraviolet Illumination on the Fixation of Silver Ions on Zinc Oxide Films and Their Photocatalytic Efficiency

Dobrina Ivanova <sup>1</sup>, Ralitsa Mladenova <sup>2</sup>, Hristo Kolev <sup>2</sup> and Nina Kaneva <sup>1,\*</sup>

<sup>1</sup> Laboratory of Nanoparticle Science and Technology, Department of General and Inorganic Chemistry, Faculty of Chemistry and Pharmacy, University of Sofia, 1 James Bourchier Blvd., 1164 Sofia, Bulgaria; dobrina.k.ivanova@gmail.com

<sup>2</sup> Institute of Catalysis, Bulgarian Academy of Sciences, Acad. G. Bonchev St., bl. 11, 1113 Sofia, Bulgaria; ralitsa@ic.bas.bg (R.M.); hgkolev@gmail.com (H.K.)

\* Correspondence: nina\_k@abv.bg

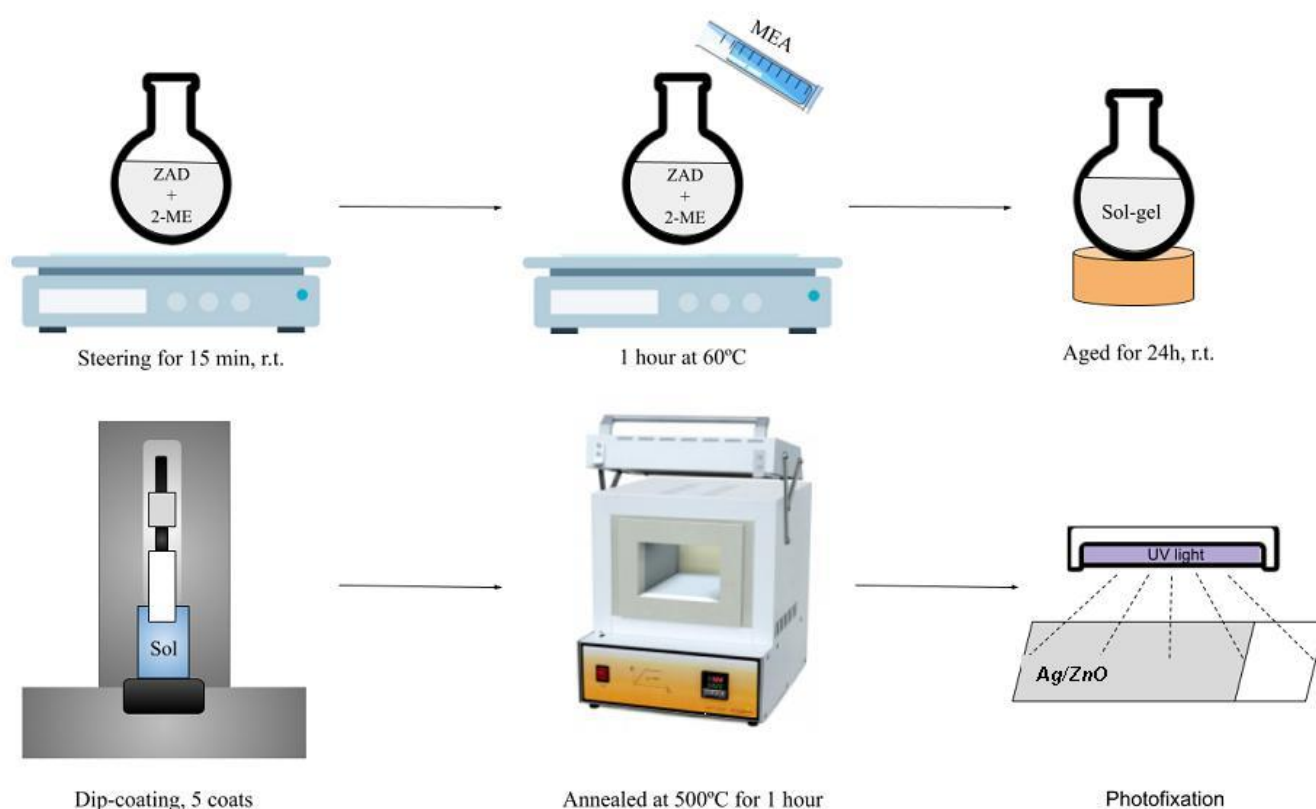

**Figure S1.** Procedure for obtaining of ZnO and Ag/ZnO/Ag sol-gel films.
